# Supplementary material for: Increased Access to Immunoglobulin Replacement Therapy for Patients with Primary Immunodeficiency in Poland Based on Clinical Usage Data of Immunoglobulin G over a 5-Year Period
Source: MDPI journal article supplement (doi:10.3390/jcm12062431), 2023-03-22
Supplement: s1 [file s1]

## Supplementary Materials:

**Table S1.** Indications for immunoglobulin G treatments in drug programs codified by ICD-10.

| Primary Immune Deficiency drug program                                                              |
|-----------------------------------------------------------------------------------------------------|
| D.80.0 Hereditary hipogammaglobulinaemia                                                            |
| D.80.1 Non-family hipogammaglobulinaemia                                                            |
| D.80.3 Selective deficiency of immunoglobulin G subclasses (IgG)                                    |
| D.80.4 Immunodeficiency with increased levels of IgM                                                |
| D.80.5 Deficiency of serum immunoglobulin antibodies similar to normal or hypergammaglobulinemia    |
| D.80.8 Other immunodeficiencies with defect prevalence of antibodies                                |
| D.80.9 Unspecified immunodeficiency with predominant antibody defect                                |
| D.81.9 Determined combined immunodeficiency                                                         |
| D.82.0 Wiskott Aldrich syndrome                                                                     |
| D.82.1 Di George syndrome                                                                           |
| D.82.3 Deficiency response to infection with EB virus                                               |
| D.82.8 Deficiency associated with other serious defects                                             |
| D.82.9 Indefinite immunodeficiency associated with severe defects                                   |
| D.83.0 Common variable immunodeficiency with a predominance of dysfunction or the number of B cells |
| D.83.1 Common variable immunodeficiency disorders predominantly related immunoregulatory T cells    |
| D.83.8 Other common immunodeficiency                                                                |
| D.83.9 Indefinite common immunodeficiency                                                           |
| D.89.9 Determined disorders involving the immune mechanism                                          |
| Neurology drug program                                                                              |
| G61.8 Other inflammatory polyneuropathies                                                           |
| G62.8 <i>Other specified polyneuropathies</i>                                                       |
| G63.1 <i>Polyneuropathy in neoplastic disease</i>                                                   |
| G70, <i>Myasthenia gravis and other myoneural disorders.</i>                                        |
| G04.8 <i>Other encephalitis, myelitis and encephalomyelitis.</i>                                    |
| G73.1 <i>Lambert-Eaton syndrome in neoplastic disease</i>                                           |
| G73.2, <i>Other myasthenic syndromes in neoplastic disease</i>                                      |
| G72.4 Inflammatory and immune myopathies, not elsewhere classified                                  |
| G61.0 Guillain-Barre syndrome                                                                       |
| G36.0 Neuromyelitis optica [Devic]                                                                  |
| M33.0 Juvenile dermatomyositis                                                                      |
| M33.1 Other dermatomyositis                                                                         |
| M33.2 Polymyositis.                                                                                 |

**Table S2.** Immunoglobulin use in grams and grams per patient reported annually in Poland in 20 most common indications outside primary immune deficiency drug program and neurology drug program reported with ICD-10 codes.

| ICD 10 CODE                                   | 2016                   | 2017                   | 2018                   | 2019                  | 2020                  | TOTAL                  |
|-----------------------------------------------|------------------------|------------------------|------------------------|-----------------------|-----------------------|------------------------|
| D69 PURPURA AND OTHER HAEMORRHAGIC CONDITIONS | 108,664.00<br>(124.47) | 128,904.25<br>(137.72) | 130,543.00<br>(127.86) | 111,756.66<br>(133.2) | 90,477.12<br>(135.24) | 570,345.03<br>(131.48) |
| C91 LYMPHOID LEUKAEMIA                        | 54,513.30<br>(68.4)    | 70,213.50<br>(80.34)   | 60,851.90<br>(68.22)   | 55,328.48<br>(72.32)  | 50,909.70<br>(70.51)  | 291,816.88<br>(72.05)  |
| D84 OTHER IMMUNODEFICIENCIES                  | 50,355.90<br>(87.27)   | 57,552.35<br>(91.35)   | 59,346.65<br>(89.24)   | 58,960.74<br>(93.59)  | 62,315.47<br>(110.68) | 288,531.11<br>(94.14)  |
| Z51 OTHER MEDICAL CARE                        | 29,296.50<br>(41.56)   | 30,445.50<br>(43.93)   | 20,289.55<br>(37.02)   | 16,854.93<br>(40.23)  | 18,362.40<br>(41.45)  | 115,248.88<br>(41.04)  |
| G62 OTHER POLYNEUROPATHIES                    | 8,405.00<br>(182.72)   | 6,963.50<br>(232.12)   | 8,407.50<br>(191.08)   | 10,817.56<br>(208.03) | 6,778.25<br>(188.28)  | 41,371.81<br>(198.9)   |
| C92 MYELOID LEUKAEMIA                         | 7,359.50<br>(41.82)    | 7,472.20<br>(44.74)    | 7,999.50<br>(47.62)    | 7,337.24<br>(52.79)   | 9,950.10<br>(59.94)   | 40,118.54<br>(49.16)   |
| J96 RESPIRATORY FAILURE                       | 9,507.90<br>(42.64)    | 6,383.80<br>(43.43)    | 7,402.40<br>(40.67)    | 9,835.11<br>(48.93)   | 6,334.03<br>(42.51)   | 39,463.24<br>(43.75)   |

|                                                                                                              |                      |                       |                      |                      |                      |                       |
|--------------------------------------------------------------------------------------------------------------|----------------------|-----------------------|----------------------|----------------------|----------------------|-----------------------|
| C85 OTHER AND UNSPECIFIED TYPES OF NON-HODGKIN LYMPHOMA                                                      | 6,101.00<br>(48.81)  | 8,174.00<br>(61.92)   | 7,306.50<br>(58.45)  | 9,310.98<br>(64.66)  | 7,551.25<br>(50.34)  | 38,443.73<br>(56.87)  |
| M32 SYSTEMIC LUPUS ERYTHEMATOSUS                                                                             | 4,822.00<br>(92.73)  | 8,239.00<br>(158.44)  | 6,296.00<br>(121.08) | 8,107.21<br>(150.13) | 10,633.80<br>(204.5) | 38,098.01<br>(145.41) |
| M31 OTHER NECROTIZING VASCULOPATHIES                                                                         | 4,182.50<br>(95.06)  | 8,952.00<br>(129.74)  | 8,278.00<br>(131.4)  | 9,502.20<br>(190.04) | 7,136.00<br>(148.67) | 38,050.70<br>(138.87) |
| M33 DERMATOPOLYMYOSITIS                                                                                      | 3,425.00<br>(142.71) | 6,729.50<br>(177.09)  | 6,773.00<br>(218.48) | 7,463.40<br>(213.24) | 8,086.00<br>(224.61) | 32,476.90<br>(198.03) |
| O99 OTHER MATERNAL DISEASES CLASSIFIABLE ELSEWHERE BUT COMPLICATING PREGNANCY, CHILDBIRTH AND THE PUERPERIUM | 7,534.00<br>(99.13)  | 11,489.00<br>(113.75) | 3,957.00<br>(197.85) | 6,098.55<br>(184.8)  | 3,296.16<br>(193.89) | 32,374.71<br>(131.07) |
| M30 POLYARTERITIS NODOSA AND RELATED CONDITIONS                                                              | 5,048.00<br>(34.11)  | 5,605.00<br>(37.37)   | 5,023.00<br>(35.37)  | 4,956.95<br>(34.66)  | 10,334.34<br>(45.13) | 30,967.29<br>(38.14)  |
| C90 MULTIPLE MYELOMA AND MALIGNANT PLASMA CELL NEOPLASMS                                                     | 6,459.00<br>(48.20)  | 7,653.00<br>(46.66)   | 5,129.00<br>(39.76)  | 5,108.24<br>(38.41)  | 6,138.20<br>(44.80)  | 30,487.44<br>(43.74)  |
| G61 INFLAMMATORY POLYNEUROPATHY                                                                              | 6,468.50<br>(122.05) | 5,304.00<br>(115.3)   | 6,374.50<br>(120.27) | 6,260.75<br>(118.13) | 5,920.68<br>(137.69) | 30,328.43<br>(122.29) |
| A41 OTHER SEPSIS                                                                                             | 4,366.50<br>(22.86)  | 6,090.00<br>(33.65)   | 4,589.50<br>(27.48)  | 3,786.31<br>(27.24)  | 7,414.88<br>(45.49)  | 26,247.19<br>(31.21)  |
| D47 OTHER NEOPLASMS OF UNCERTAIN OR UNKNOWN BEHAVIOUR OF LYMPHOID, HAEMATOPOIETIC AND RELATED TISSUE         | 3,362.00<br>(101.88) | 4,983.50<br>(113.26)  | 5,644.50<br>(112.89) | 3,569.50<br>(67.35)  | 5,663.50<br>(117.99) | 23,223.00<br>(101.86) |
| L10 PEMPHIGUS                                                                                                | 2,749.00<br>(458.17) | 4,596.00<br>(510.67)  | 3,049.00<br>(338.78) | 3,619.00<br>(517.00) | 6,790.00<br>(617.27) | 20,803.00<br>(495.31) |
| D46 MYELOYDYSPLASTIC SYNDROMES                                                                               | 3,105.50<br>(83.93)  | 5,116.00<br>(89.75)   | 3,852.00<br>(87.55)  | 3,899.45<br>(77.99)  | 4,623.30<br>(90.65)  | 20,596.25<br>(86.18)  |
| G04 ENCEPHALITIS, MYELITIS AND ENCEPHALOMYELITIS                                                             | 1,596.00<br>(53.20)  | 3,240.50<br>(81.01)   | 4,565.50<br>(108.70) | 4,841.61<br>(79.37)  | 5,576.91<br>(118.66) | 19,820.52<br>(90.09)  |

**Table S3.** The number of patients treated annually with immunoglobulins in Poland in 20 most common indications outside primary immune deficiency drug program and neurology drug program, reported with ICD-10 codes.

| <b>YEAR<br/>ICD 10 CODE</b>                                                  | <b>2016</b> | <b>2017</b> | <b>2018</b> | <b>2019</b> | <b>2020</b> | <b>Total<br/>over 5-years</b> |
|------------------------------------------------------------------------------|-------------|-------------|-------------|-------------|-------------|-------------------------------|
| D69 PURPURA AND OTHER HAEMORRHAGIC CONDITIONS                                | 873         | 936         | 1,021       | 839         | 669         | 4,338                         |
| C91 LYMPHOID LEUKAEMIA                                                       | 797         | 874         | 892         | 765         | 722         | 4,050                         |
| D84 OTHER IMMUNODEFICIENCIES                                                 | 577         | 630         | 665         | 630         | 563         | 3,065                         |
| 080 SINGLE SPONTANEOUS DELIVERY                                              | 1,131,      | 1,149,      | 370         | 179         | 167         | 2,996                         |
| Z51 OTHER MEDICAL CARE                                                       | 705         | 693         | 548         | 419         | 443         | 2,808                         |
| O82 SINGLE DELIVERY BY CAESAREAN SECTION                                     | 1,027       | 982         | 235         | 112         | 137         | 2,493                         |
| J96 RESPIRATORY FAILURE                                                      | 223         | 147         | 182         | 201         | 149         | 902                           |
| A41 OTHER SEPSIS                                                             | 191         | 181         | 167         | 139         | 163         | 841                           |
| C92 MYELOID LEUKAEMIA                                                        | 176         | 167         | 168         | 139         | 166         | 816                           |
| M30 POLYARTERITIS NODOSA AND RELATED CONDITIONS                              | 148         | 150         | 142         | 143         | 229         | 812                           |
| O02 OTHER ABNORMAL PRODUCTS OF CONCEPTION                                    | 232         | 281         | 102         | 74          | 59          | 748                           |
| C90 MULTIPLE MYELOMA AND MALIGNANT PLASMA CELL NEOPLASMS                     | 134         | 164         | 129         | 133         | 137         | 697                           |
| C85 OTHER AND UNSPECIFIED TYPES OF NON-HODGKIN LYMPHOMA                      | 125         | 132         | 125         | 144         | 150         | 676                           |
| O03 FETUS AND NEWBORN AFFECTED BY OTHER COMPLICATIONS OF LABOUR AND DELIVERY | 150         | 147         | 97          | 82          | 65          | 541                           |
| J18 PNEUMONIA, ORGANISM UNSPECIFIED                                          | 90          | 71          | 81          | 44          | 32          | 318                           |
| C83 NON-FOLLICULAR LYMPHOMA                                                  | 74          | 72          | 61          | 50          | 51          | 308                           |

|                                                   |    |    |    |    |     |     |
|---------------------------------------------------|----|----|----|----|-----|-----|
| J15 BACTERIAL PNEUMONIA, NOT ELSEWHERE CLASSIFIED | 73 | 70 | 60 | 59 | 32  | 294 |
| Z84 TRANSPLANTED ORGAN AND TISSUE STATUS          | 41 | 34 | 39 | 79 | 100 | 293 |
| M31 OTHER NECROTIZING VASCULOPATHIES              | 44 | 69 | 63 | 50 | 48  | 274 |
| P28 OMPHALITIS OF NEWBORN                         | 46 | 46 | 36 | 80 | 59  | 267 |
